# Supplementary material for: Pharmacologically altered Androgens, Brain Activation and Response Inhibition in a Stop-Signal Task in Male Heavy Drinkers
Source: Research Square preprint supplement (doi:10.21203/rs.3.rs-8347303/v1), 2026-01-13
Supplement: Supplementary file 1 [file df7e07419e8cea7d7c39ab64.docx]

**Supplement to**

**Pharmacologically altered Androgens, Brain Activation and Response Inhibition in a Stop-Signal Task in Male Heavy Drinkers**

Marlene Kundlacz1,2, Rafat Boroumand-Jazi1, Sabine Hoffmann1, Christiane Mühle3, Iris Reinhard4, Matthias Reichl1, Leonard Wenger1, Haoye Tan1, Patrick Bach1,5, Sabine Vollstädt-Klein1,5,7, Georg W. Alpers2, Falk Kiefer1,5,6,7, Bernd Lenz1,5,7#, Sarah Gerhardt1,5*#

1Department of Addictive Behavior and Addiction Medicine, Central Institute of Mental Health (CIMH), Medical Faculty Mannheim, Heidelberg University, Mannheim, Germany.

2Chair of Clinical and Biological Psychology and Psychotherapy, Faculty of Social Sciences, University of Mannheim, Germany.

3Department of Psychiatry and Psychotherapy, Friedrich-Alexander-Universität Erlangen-Nürnberg (FAU), Erlangen, Germany.

4Department of Biostatistics, Central Institute of Mental Health (CIMH), Medical Faculty Mannheim, Heidelberg University, Mannheim, Germany

5Deutsche Zentrum für Psychische Gesundheit (German Center for Mental Health), Partner Site Mannheim-Heidelberg-Ulm.

6Feuerlein Center on Translational Addiction Medicine (FCTS), University of Heidelberg, Germany.

7Mannheim Centre for Translational Neurosciences (MCTN), Medical Faculty Mannheim, Heidelberg University, Mannheim, Germany

*Corresponding author at: Department of Addictive Behavior and Addiction Medicine, Central Institute of Mental Health (CIMH), Medical Faculty Mannheim, Heidelberg University, J 5, 68159 Mannheim, Germany. Phone: +49 621 1703-3927, Fax: +49 621 1703-3505. E-Mail: [sarah.gerhardt @zi-mannheim.de](mailto:sarah.gerhardt%20@zi-mannheim.de)

#both authors contributed equally

# 1. Inclusion and exclusion criteria

Inclusion criteria

- Male sex
- Age 18 – 65 years
- Body Mass Index 18.5 – 30 kg/m2
- Heavy episodic drinking (five or more drinks on one occasion at least once a month)
- Ability to consent after detailed written information and ability to undergo functional magnetic resonance imaging measurement
- Written informed consent
- Sufficiently good German
- Breath alcohol concentration of 0.0 per mille

Exclusion criteria

- Medical history of outpatient or inpatient treatment of depressive or bipolar disorder, schizophrenia or schizophrenic spectrum disorder, or substance use disorder other than alcohol, nicotine and cannabis
- Medical history of a severe head injury or other serious diseases of the central nervous system (e.g. dementia, Parkinson’s disease, multiple sclerosis)
- Intake of any drugs or medication that interact with the central nervous system
- Intake of any drugs or medication that interact with the central nervous system within the last 10 days or less than 5 half-lives ago
- Exclusion criteria for use of finasteride: regular use of finasteride, known hypersensitivity to finasteride, clinically significant pharmacokinetic interactions, planned pregnancy with sexual intercourse without contraception or pregnant partner
- Exclusion criteria for functional magnetic resonance imaging measurement (e.g. metal in the body

**2. Figure S1 displays available data and dropouts according to the CONSORT flow diagram**


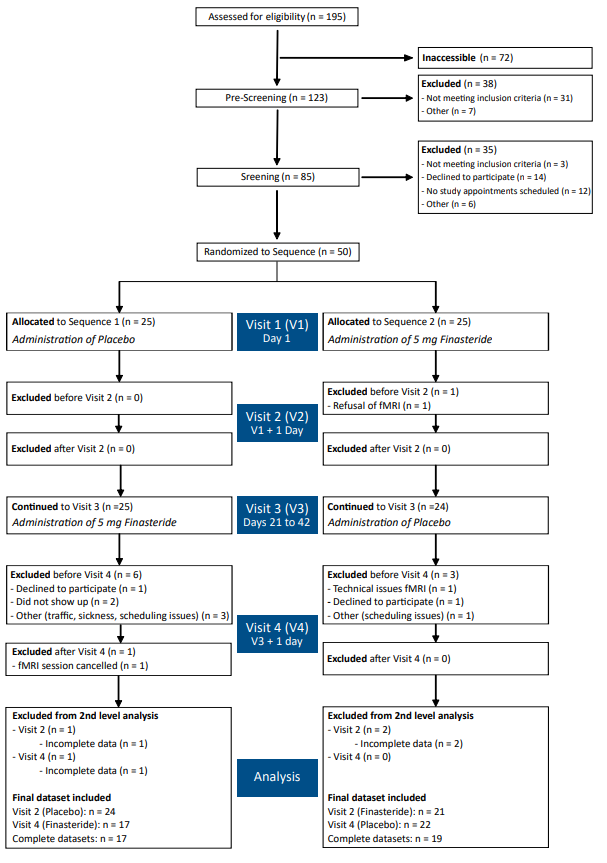


**3. Contrasts as specified for the full factorial model in SPM12**

**Table S1: Titles of contrasts and numbers as entered for weights vectors in the full factorial model with hormones as an active covariate**

| Factor | Name of Contrast | Weights vector |
| --- | --- | --- |
| Time point | Main time T1 > T2 | 1 -1 0 0 0.5 0.5 -0.5 -0.5 0 |
| Time point | Main time T1 < T2 | -1 1 0 0 -0.5 -0.5 0.5 0.5 0 |
|  | Interaction Time point x Sequence | 0 0 0 0 1 -1 -1 1 0 |
| Sequence | Main sequence Placebo-Medication > Medication-Placebo | 0 0 1 -1 0.5 -0.5 0.5 -0.5 0 |
| Sequence | Main sequence Placebo-Medication < Medication - Placebo | 0 0 -1 1 -0.5 0.5 -0.5 0.5 0 |
| Covariate | Influence hormones (+) | 0 0 0 0 0 0 0 0 1 |
| Covariate | Influence hormones (-) | 0 0 0 0 0 0 0 0 -1 |

*Note: Main*, Main Effect. *Interaction*, Interaction effect. T1 and T2 correspond to V2 and V4, respectively. The nine weight vectors (regressors) correspond to main effects of T1 (1) and T2 (2), sequence 1 (3) and sequence 2 (4), and the hormone covariate (9). Vectors 5 to 8 result from the applied full factorial model and represent factor weights as well.

**4. Sample characteristics at baseline (visit one)**

**Table S2: Sample characteristics at baseline by sequence**

| Sequence | Fin - Pla | |  | Pla - Fin | | Mean difference |
| --- | --- | --- | --- | --- | --- | --- |
|  | *M* | *SD* | | *M* | *SD* |  |
| Age | 33.95 | 14.40 | | 33.04 | 13.03 | *t*(45) = .23, *p* = .82 |
| Height (cm) | 182.50 | 7.60 | | 182.72 | 7.14 | *t*(45) = -.10, *p* = .92 |
| Weight (kg) | 84.05 | 13.84 | | 81.8 | 9.75 | *t*(45) = .65, *p* = .52 |
| AUDIT | 10.77 | 5.11 | | 11.83 | 4.97 | *t*(45) = -.71, *p* = .48 |
| BIS (sum score) | 30.73 | 5.70 | | 29.52 | 5.11 | *t*(45) = .77, *p* = .45 |

*Note: S*tatistics for mean differences were conducted by using independent samples t-Tests in SPSS (IBM SPSS Statistics, Version 29.0, 2022). *Fin,* Finasteride. *Pla,* Placebo. *M,* mean. *SD,* standard deviation. *AUDIT,* Alcohol Use Disorders Identification Test. *BIS,* Baratt Impulsiveness Scale.

**5. Results tables for whole brain analyses**

**Table S3: Significantly activated brain regions during *‘*stop success’, ‘stop error’, and ‘stop success vs. stop error’ on the whole brain level for placebo only (*n* = 38) in a one sample t-Test in SPM12**

| Contrast | Nr. of voxelsper cluster *k* | Brain regions | Peak MNI-Coordinates  x y z | Extent threshold | Peak-Level *t* | Cluster-Level *pFWE corrected* |
| --- | --- | --- | --- | --- | --- | --- |
| ss > se | 614  634  354  324 | Cluster 1 ss<se: Frontal inferior opercular gyrus L, Insula L  Cluster 2 ss<se: Postcentral gyrus L, Parietal inferior gyrus L  Cluster 3 ss<se: Precentral gyrus R, Postcentral gyrus R  Cluster 4 ss>se: Paracentral lobule, Supplementary Motor Area R | -48 8 4  -58 -22 50  54 -16 50  12 -22 58 | 212  212  212  324 | 4.48  6.41  4.70  4.85 | <.001  <.001  .004  .007 |
| ss | 13821  10015  8817  1828  621  412  391  225  804 | Cluster 1 ss>0: Temporal middle gyrus R, Occipital middle gyrus R, Supramarginal gyrus R, Temporal superior gyrus R  Cluster 2 ss>0: Occipital middle gyrus L, Temporal middle gyrus L, Fusiform L  Cluster 3 ss>0: Frontal inferior opercular gyrus R, Precentral gyrus, Insula R, Supplementary motor area  Cluster 4 ss>0: Insula L  Cluster 5 ss<0: Precuneus  Cluster 6 ss>0: Frontal middle gyrus R  Cluster 7 ss<0: Angular gyrus L  Cluster 8 ss<0: Postcentral gyrus L  Cluster 9 ss<0: Precentral gyrus R, Postcentral gyrus R | 50 -66 0  -48 -66 6  34 20 4  -32 20 -8  -16 -52 18  28 48 18  -42 -72 32  -56 -16 50  34 -28 72 | 258  258  258  258  225  258  225  225  225 | 9.76  11.07  8.71  8.80  4.97  4.55  5.28  4.27  5.33 | <.001  <.001  <.001  <.001  <.001  .007  .001  0.014  <.001 |
| se | 534 | Cluster 1 se<0: Cerebelum R | 40 -68 -40 | 534 | 5.50 | <.001 |
|  | 8444 | Cluster 2 se>0: Occipital middle gyrus L, Parietal inferior gyrus L, Temporal middle gyrus L, Fusiform L | -40 -56 -14 | 318 | 12.30 | <.001 |
|  | 11169 | Cluster 3 se>0: Temporal middle gyrus R, Supramarginal gyrus R | 48 -66 0 | 318 | 10.70 | <.001 |
|  | 1016 | Cluster 4 se<0: Frontal medial orbital gyrus, Rectus, Frontal inferior orbital gyrus L | 4 44 -18 | 534 | 5.97 | <.001 |
|  | 3873 | Cluster 5 se>0: Insula L, Precentral gyrus L, Frontal inferior opercular gyrus L | -32 22 10 | 318 | 10.77 | <.001 |
|  | 9691 | Cluster 6 se>0: Frontal inferior opercular gyrus R, Supplementary motor area | 40 16 2 | 318 | 9.94 | <.001 |
|  | 954 | Cluster 7 se<0: Precuneus | 36 -44 0 | 534 | 5.24 | <.001 |
|  | 885 | Cluster 8 se<0: Angular gyrus L, Occipital middle gyrus L | -44 -76 38 | 534 | 5.97 | <.001 |
|  | 1014 | Cluster 9 se<0: Frontal superior gyrus L, Frontal middle gyrus L | -24 20 38 | 534 | 5.41 | <.001 |

*Note:* Regions are labelled according to the automated anatomical labelling atlas 3 (Rolls, Huang, Lin, Feng, & Joliot, 2020). The analyses were corrected combing a voxel-wise-threshold of *puncorr*< 0.001 with a cluster-extend-threshold determined with random field theory in SPM12 for *pFWE*< 0.05. *MNI-Coordinates*, Montreal Neurological Institute (Fonov, Evans, McKinstry, Almli, & Collins, 2009). *Ss,* stop success. *Se,* stop error. *R,* right. *L,* left. No specification, both R and L

A successful implementation of the SST paradigm in our sample was demonstrated by significant neural activation in regions relevant for behavioral control using fMRI data from the placebo condition (e.g., (Bednarski et al., 2012; Li, Luo, Yan, Bergquist, & Sinha, 2009; Ray Li, Huang, Constable, & Sinha, 2006)).

**6.** **Mixed model analyses with behavioral data**

**Table S4:** **Results from mixed models analyses with behavioral data from the SST as outcome variables**

|  | β [95% CI] | *F*(df1, df2) | *p* |
| --- | --- | --- | --- |
| **DHT only** |  |  |  |
| **Mean SSRT (msec)** |  |  |  |
| Intercept | 262.28 [163.78; 360.78] | *F*(1, 75) = 28.13 | **<.001** |
| DHT post | -.13 [-.32; .06] | *F*(1, 76) = 1.83 | .180 |
| Age | .78 [-.88; 2.45] | *F*(1, 46) = .89 | .349 |
| **Mean go RT (msec)** |  |  |  |
| Intercept | 388.21 [248.17; 528.26] | *F*(1, 77) = 30.47 | **<.001** |
| DHT post | .13 [-.13; .39] | *F*(1, 72) = 1.03 | .313 |
| Age | 3.12 [.63; 5.61] | *F*(1, 48) = 6.36 | **.015** |
| **Mean SSD** |  |  |  |
| Intercept | 96.02 [-127.88; 319.93] | *F*(1, 77) = .73 | .396 |
| DHT post | .35 [-.07; .78] | *F*(1, 77) = 2.70 | .104 |
| Age | 2.47 [-1.35; 6.28] | *F*(1, 48) = 1.69 | .200 |
| **DHT with factors** |  |  |  |
| **Mean SSRT (msec)** |  |  |  |
| Intercept | 285.85 [178.50; 393.20] | *F*(1, 72)= 26.54 | **<.001** |
| Time point | -3.03 [-29.71; 23.64] | *F*(1, 34)= 0.52 | .475 |
| medication | -6.69 [-45.98; 32.61] | *F*(1, 40)= 0.12 | .733 |
| Sequence | -20.08 [-68.88; 28.73] | *F*(1, 42)= 1.07 | .308 |
| DHT post | -.15 [-.37; .06] | *F*(1, 76)= 2.11 | .150 |
| Age | .73 [-.95; 2.42] | *F*(1, 46)= 0.77 | .386 |
| **Mean go RT (msec)** |  |  |  |
| Intercept | 355.91 [203.55; 508.27] | *F*(1, 74)= 23.25 | **<.001** |
| Time point | -21.58 [-55.87; 12.70] | *F*(1, 36)= 0.66 | .421 |
| medication | 24.79 [-25.97; 75.54] | *F*(1, 41) = 0.97 | .330 |
| Sequence | 21.87 [-50.31; 94.06] | *F*(1, 44)= 1.00 | .322 |
| DHT post | .21 [-.08; .50] | *F*(1, 72)= 2.03 | .159 |
| Age | 3.16 [.64; 5.68] | *F*(1, 47)= 6.36 | **.015** |
| **Mean SSD (msec)** |  |  |  |
| Intercept | 58.95 [-184.12; 302.02] | *F*(1, 73)= 0.48 | .492 |
| Time point | -20.04 [-80.09; 40.01] | *F*(1, 37)= 0.58 | .450 |
| medication | 9.98 [-77.93; 97.89] | *F*(1, 43) = 0.05 | .820 |
| Sequence | 62.82 [-47.59; 173.24] | *F*(1, 44)= 1.73 | .195 |
| DHT post | .40 [-.07; .88] | *F*(1, 77)= 2.84 | .096 |
| Age | 2.36 [1.47; 6.18] | *F*(1, 47)= 1.53 | .222 |
|  |  |  |  |
| **T only** |  |  |  |
| **Mean SSRT (msec)** |  |  |  |
| Intercept | 248.83 [149.39; 348.26] | *F*(1, 70) = 24.92 | **<:001** |
| T post | -6.65 [-19.91; 6.60] | *F*(1, 79) = 1.00 | .321 |
| Age | .83 [-.84; 2.51] | *F*(1, 44) = 1.00 | .322 |
| **Mean go RT (msec)** |  |  |  |
| Intercept | 355.99 [214.79; 497.18] | *F*(1, 75) = 25.23 | **<.001** |
| T post | 14.44 [-3.68; 32.56] | *F*(1, 76) = 2.52 | .117 |
| Age | 3.37 [.86; 5.89] | *F*(1, 48) = 7.26 | **.010** |
| **Mean SSD (msec)** |  |  |  |
| Intercept | 119.08 [-107.84; 346.01] | *F*(1, 72) = 1.09 | .299 |
| T post | 20.53 [-9.52; 50.57] | *F*(1, 80) = 1.85 | .178 |
| Age | 2.42 [-1.44; 6.28] | *F*(1, 48) = 1.59 | .213 |
| **T with factors** |  |  |  |
| **Mean SSRT (msec)** |  |  |  |
| Intercept | 286.92 [175.82; 398.01] | *F*(1, 69)= 27.37 | **<.001** |
| Time point | -11.05 [-37.44; 15.35] | *F*(1, 33)= 0.75 | .394 |
| medication | 6.24 [-30.83; 43.30] | *F*(1, 33)= 0.12 | .734 |
| Sequence | -30.65 [-80.33; 19.03] | *F*(1, 42)= 1.46 | .234 |
| T post | -9.73 [-23.60; 4.14] | *F*(1, 76)= 1.95 | .166 |
| Age | .71 [-.96; 2.38] | *F*(1, 44)= 0.74 | .393 |
| **Mean go RT (msec)** |  |  |  |
| Intercept | 334.29 [177.36; 491.21] | *F*(1, 73)= 23.30 | **<.001** |
| Time point | -9.95 [-42.42; 22.52] | *F*(1, 36)= 0.33 | .571 |
| medication | 6.95 [-38.61; 52.50] | *F*(1, 36) = 0.10 | .759 |
| Sequence | 39.21 [-34.48; 112.90] | *F*(1, 46)= 1.51 | .225 |
| T post | 16.14 [-2.80; 35.09] | *F*(1, 73)= 2.88 | .094 |
| Age | 3.30 [.78; 5.82] | *F*(1, 48)= 6.95 | **.011** |
| **Mean SSD (msec)** |  |  |  |
| Intercept | 53.90 [-197.72; 305.51] | *F*(1, 71)= 0.66 | .420 |
| Time point | 1.22 [-57.18; 59.63] | *F*(1, 37)= 0.30 | .586 |
| medication | -24.65 [-105.73; 56.44] | *F*(1, 37) = 0.38 | .542 |
| Sequence | 91.63 [-21.29; 204.56] | *F*(1, 45)= 2.30 | .137 |
| T post | 25.75 [-5.49; 56.99] | *F*(1, 77)= 2.69 | .105 |
| Age | 2.41 [-1.41; 6.24] | *F*(1, 47)= 1.62 | .210 |

*Note*. *95% CI*, 95% confidence interval. *β,* regression coefficient. *Msec,* milli seconds*. SSRT*, stop signal reaction time. *RT*, reaction time. *SSD*, stop signal delay. Age and DHT (post medication/placebo administration) were included as covariates. The multilevel models include fixed and random intercepts. Significant results (p < 0.05) are highlighted in bold.

# 7. The stop-signal task (SST)

The well-established setup of the SST is designed for participants to reach an average of 50% stop successes and 50% stop errors (see (Gan et al., 2014)) for more details). To reach approximately 50% stop successes and stop errors (i.e., probability of inhibition (PI)), the time that passed between a simple signal (arrow pointing to the right or left) and a stop signal (arrow pointing upwards) was dynamically adapted throughout the experiment. This so-called stop signal delay time (SSD) was increased by 50 ms following a successfully inhibited response and decreased by 50 ms in case of a failure to inhibit. Accordingly, a longer SSD indicated better inhibitory performance, as inhibition was still successful although the stop signal appeared with more delay to the signal before. Additionally, reaction times (RT) and the percentage of successful stop trails were assessed, and the stop signal reaction time (SSRT) was calculated to estimate response latency of response inhibition according to Gan and colleagues (Gan et al., 2014). Overall, good test-retest reliability is known regarding neural correlates of the SST for the inferior and middle frontal, superior parietal, and precentral gyri for correct stop vs. correct go trials (i.e., successful inhibition) (Korucuoglu et al., 2021).

**References**

Bednarski, S. R., Erdman, E., Luo, X., Zhang, S., Hu, S., & Li, C. S. R. (2012). Neural Processes of an Indirect Analog of Risk Taking in Young Nondependent Adult Alcohol Drinkers—An fMRI Study of the Stop Signal Task. *Alcoholism: Clinical and Experimental Research, 36*(5), 768-779. doi:10.1111/j.1530-0277.2011.01672.x

Faul, F., Erdfelder, E., Lang, A.-G., & Buchner, A. (2007). G*Power 3: A flexible statistical power analysis program for the social, behavioral, and biomedical sciences. *Behavior Research Methods, 39*(2), 175-191. doi:10.3758/bf03193146

Ferguson, C. J. (2016). *An effect size primer: A guide for clinicians and researchers*. Washington, DC, US: American Psychological Association.

Fonov, V. S., Evans, A. C., McKinstry, R. C., Almli, C. R., & Collins, D. L. (2009). Unbiased nonlinear average age-appropriate brain templates from birth to adulthood. *NeuroImage, 47*, S102. doi:<https://doi.org/10.1016/S1053-8119(09)70884-5>

Gan, G., Guevara, A., Marxen, M., Neumann, M., Jünger, E., Kobiella, A., . . . Smolka, M. N. (2014). Alcohol-Induced Impairment of Inhibitory Control Is Linked to Attenuated Brain Responses in Right Fronto-Temporal Cortex. *Biological Psychiatry, 76*(9), 698-707. doi:<https://doi.org/10.1016/j.biopsych.2013.12.017>

Korucuoglu, O., Harms, M. P., Astafiev, S. V., Golosheykin, S., Kennedy, J. T., Barch, D. M., & Anokhin, A. P. (2021). Test-Retest Reliability of Neural Correlates of Response Inhibition and Error Monitoring: An fMRI Study of a Stop-Signal Task. *Frontiers in Neuroscience, 15*. doi:10.3389/fnins.2021.624911

Li, C. S. R., Luo, X., Yan, P., Bergquist, K., & Sinha, R. (2009). Altered Impulse Control in Alcohol Dependence: Neural Measures of Stop Signal Performance. *Alcoholism: Clinical and Experimental Research, 33*(4), 740-750. doi:10.1111/j.1530-0277.2008.00891.x

Ray Li, C.-S., Huang, C., Constable, R. T., & Sinha, R. (2006). Imaging Response Inhibition in a Stop-Signal Task: Neural Correlates Independent of Signal Monitoring and Post-Response Processing. *The Journal of Neuroscience, 26*(1), 186-192. doi:10.1523/jneurosci.3741-05.2006

Rolls, E. T., Huang, C.-C., Lin, C.-P., Feng, J., & Joliot, M. (2020). Automated anatomical labelling atlas 3. *NeuroImage, 206*, 116189. doi:<https://doi.org/10.1016/j.neuroimage.2019.116189>
